# Supplementary material for: How Does Circadian Rhythm Impact Salt Sensitivity of Blood Pressure in Mice? A Study in Two Close C57Bl/6 Substrains
Source: PubMed Central journal article supplement (PMC4835052; doi:10.1371/journal.pone.0153472), 2016-04-18

**A. Standard Light/Dark cycle cohorts**

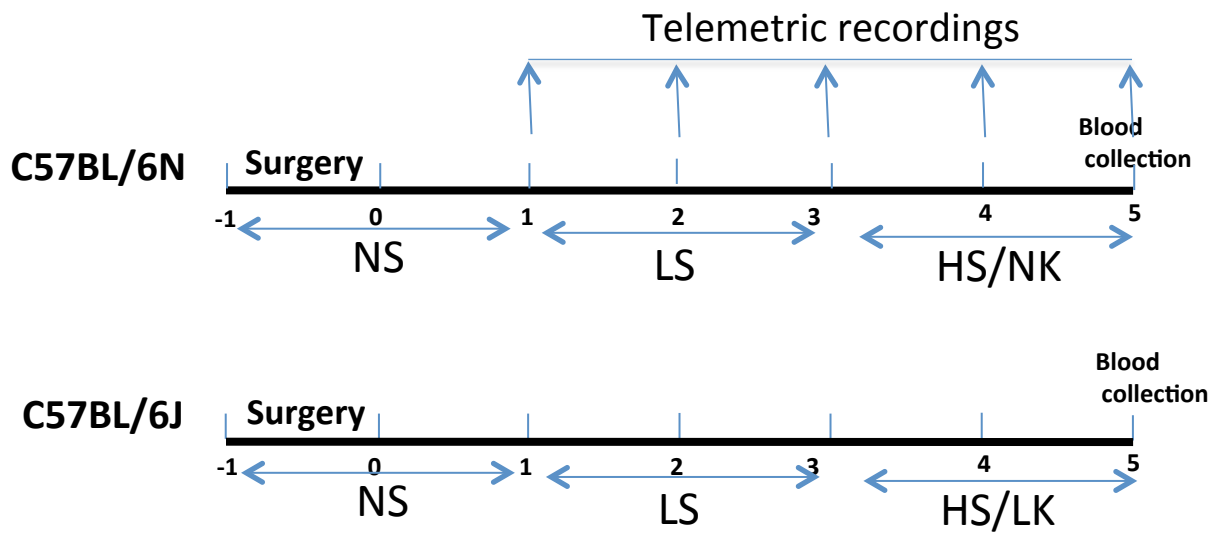

**B. Modified Light/Dark cycle cohorts**

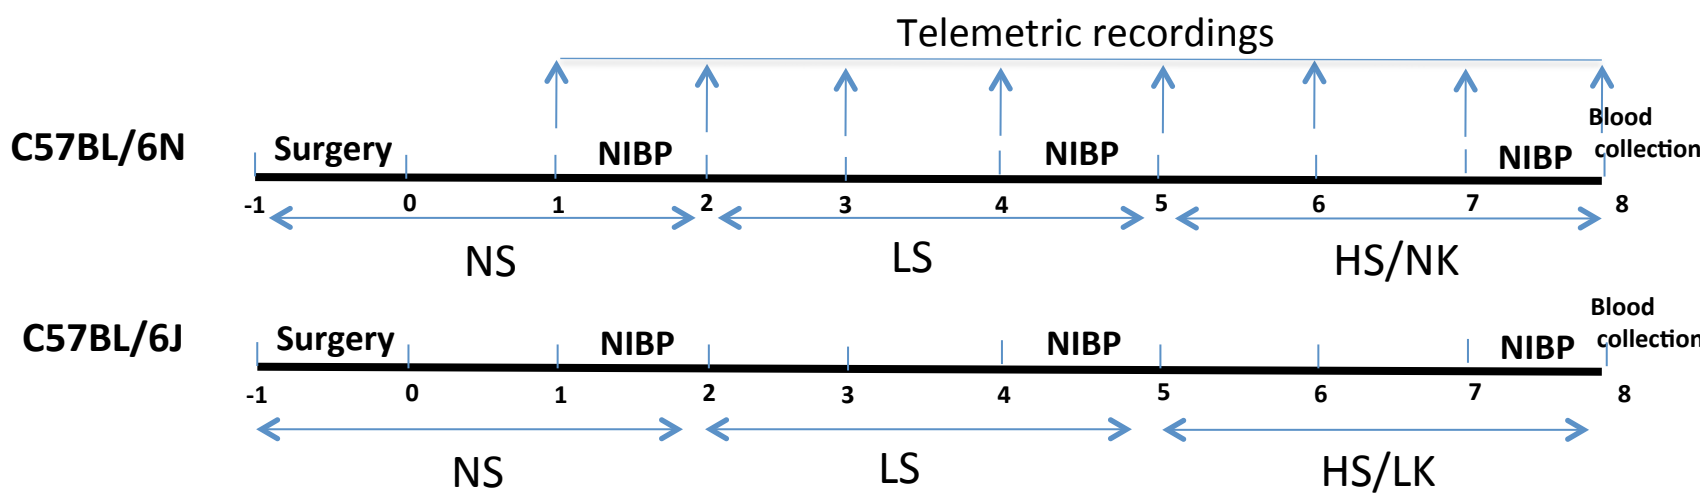

**C. Light/Dark cycle**

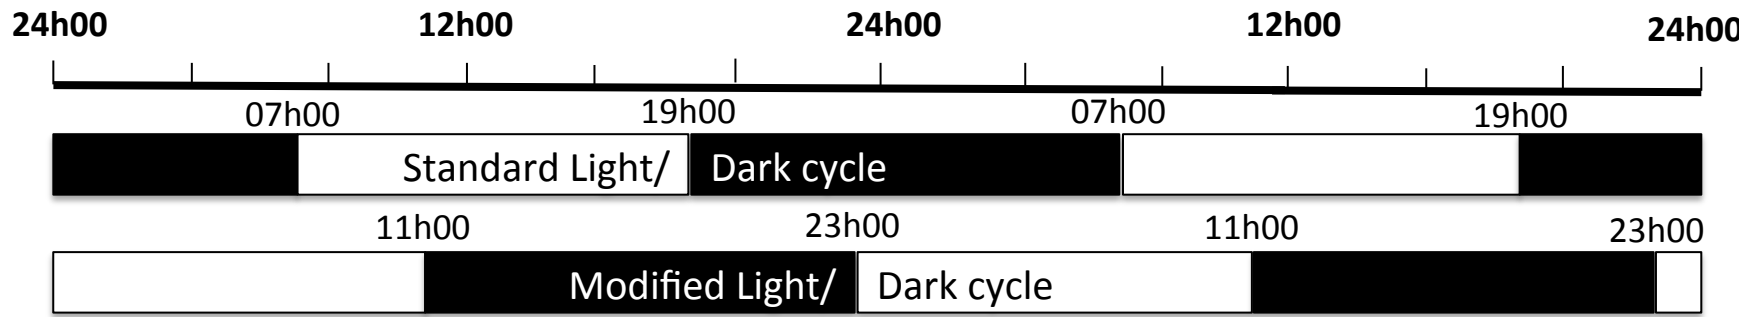

Supplement: pone.0153472.s001.pdf [file pone.0153472.s001.pdf]
