# Supplementary material for: How Does Circadian Rhythm Impact Salt Sensitivity of Blood Pressure in Mice? A Study in Two Close C57Bl/6 Substrains
Source: PubMed Central journal article supplement (PMC4835052; doi:10.1371/journal.pone.0153472), 2016-04-18
Supplement: pone.0153472.s002.pdf [file pone.0153472.s002.pdf]

**S2 fig. A : Tracings example of a continuous blood pressure recording in C57Bl6/J mice during 12 hours of the dark period.** Dark lines represent mice under normal salt diet and colored lines represent mice under High salt/normal potassium diet.

**A.**

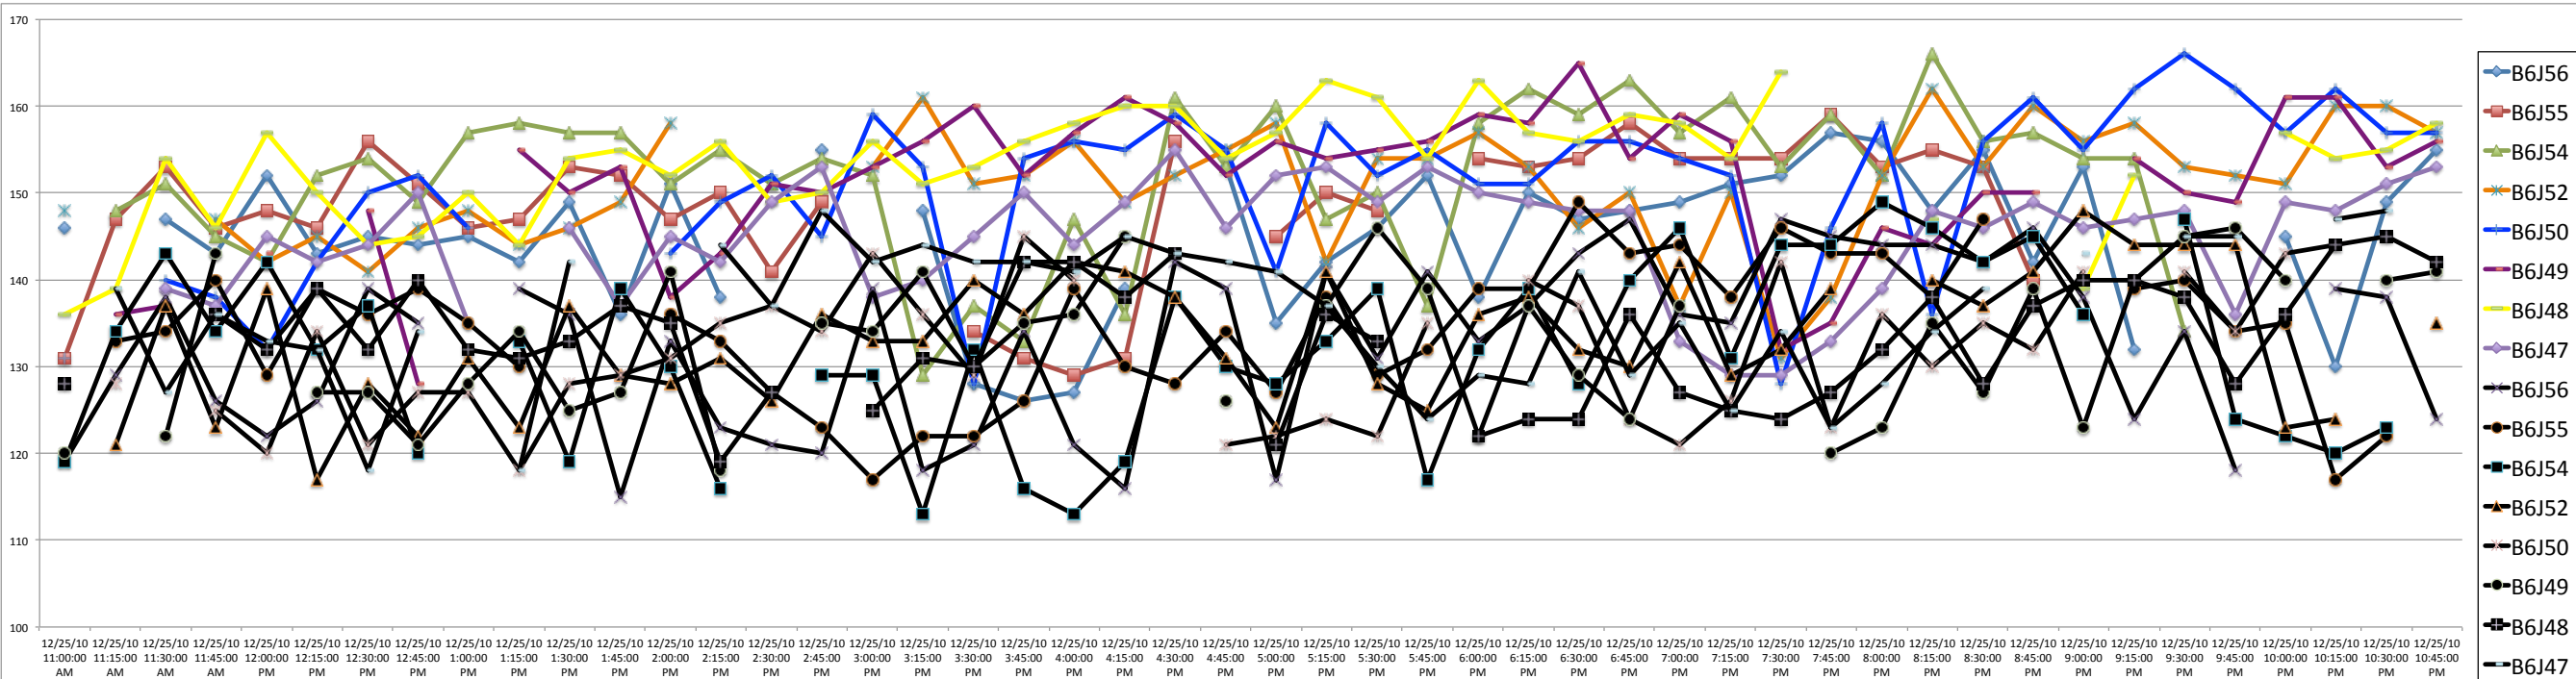

**B.**

|              | Standard deviation | B6J56 | B6J55 | B6J54 | B6J52 | B6J50 | B6J49 | B6J48 | B6J47 | Mean  |
|--------------|--------------------|-------|-------|-------|-------|-------|-------|-------|-------|-------|
| Dark period  | Normal salt        | 9.7   | 7.9   | 10.3  | 7.5   | 7.9   | 8.4   | 6.9   | 8.2   | * 8.3 |
|              | High salt          | 8.2   | 8.1   | 8.7   | 6.8   | 9.4   | 8.4   | 6.5   | 6.6   | * 7.9 |
| Light period | Normal salt        | 6.4   | 4.9   | 5.3   | 8.0   | 8.9   | 6.4   | 7.0   | 6.7   | 6.7   |
|              | High salt          | 5.8   | 6.7   | 5.9   | 6.6   | 7.4   | 5.2   | 6.3   | 5.6   | 6.2   |

**S2 fig. B : Standard deviation table of a continuous blood pressure recording in C57Bl6/J mice during 24 hours..** Standard deviation comparison were made using Bartlett's test (\* p<0.05, Light vs. Dark period)
